# Supplementary material for: Constructing an adult orofacial premotor atlas in Allen mouse CCF
Source: eLife journal article supplement (doi:10.7554/elife.67291), 2021-04-27
Supplement: supp [file elife-67291-supp-v1.zip]

Archive with 12 entries (12 files):
- elife_poa_e67291_Figure_1_figure_supplement_1.jpg
- elife_poa_e67291_Figure_2_figure_supplement_1.jpg
- elife_poa_e67291_Figure_5_figure_supplement_1.jpg
- elife_poa_e67291_Figure_5_figure_supplement_2.jpg
- elife_poa_e67291_Figure_5_figure_supplement_3.jpg
- elife_poa_e67291_Figure_5_figure_supplement_4.jpg
- elife_poa_e67291_Figure_5_figure_supplement_5.jpg
- elife_poa_e67291_Figure_5_source_data_1.zip
- elife_poa_e67291_Figure_5_source_data_2.zip
- elife_poa_e67291_Figure_5_video_1.mp4
- elife_poa_e67291_Figure_7_figure_supplement_1.jpg
- elife_poa_e67291_Transparent_Reporting_File.pdf
