# Supplementary figures and images for: Constructing an adult orofacial premotor atlas in Allen mouse CCF
Source: eLife journal article supplement (doi:10.7554/elife.67291), 2021-04-27

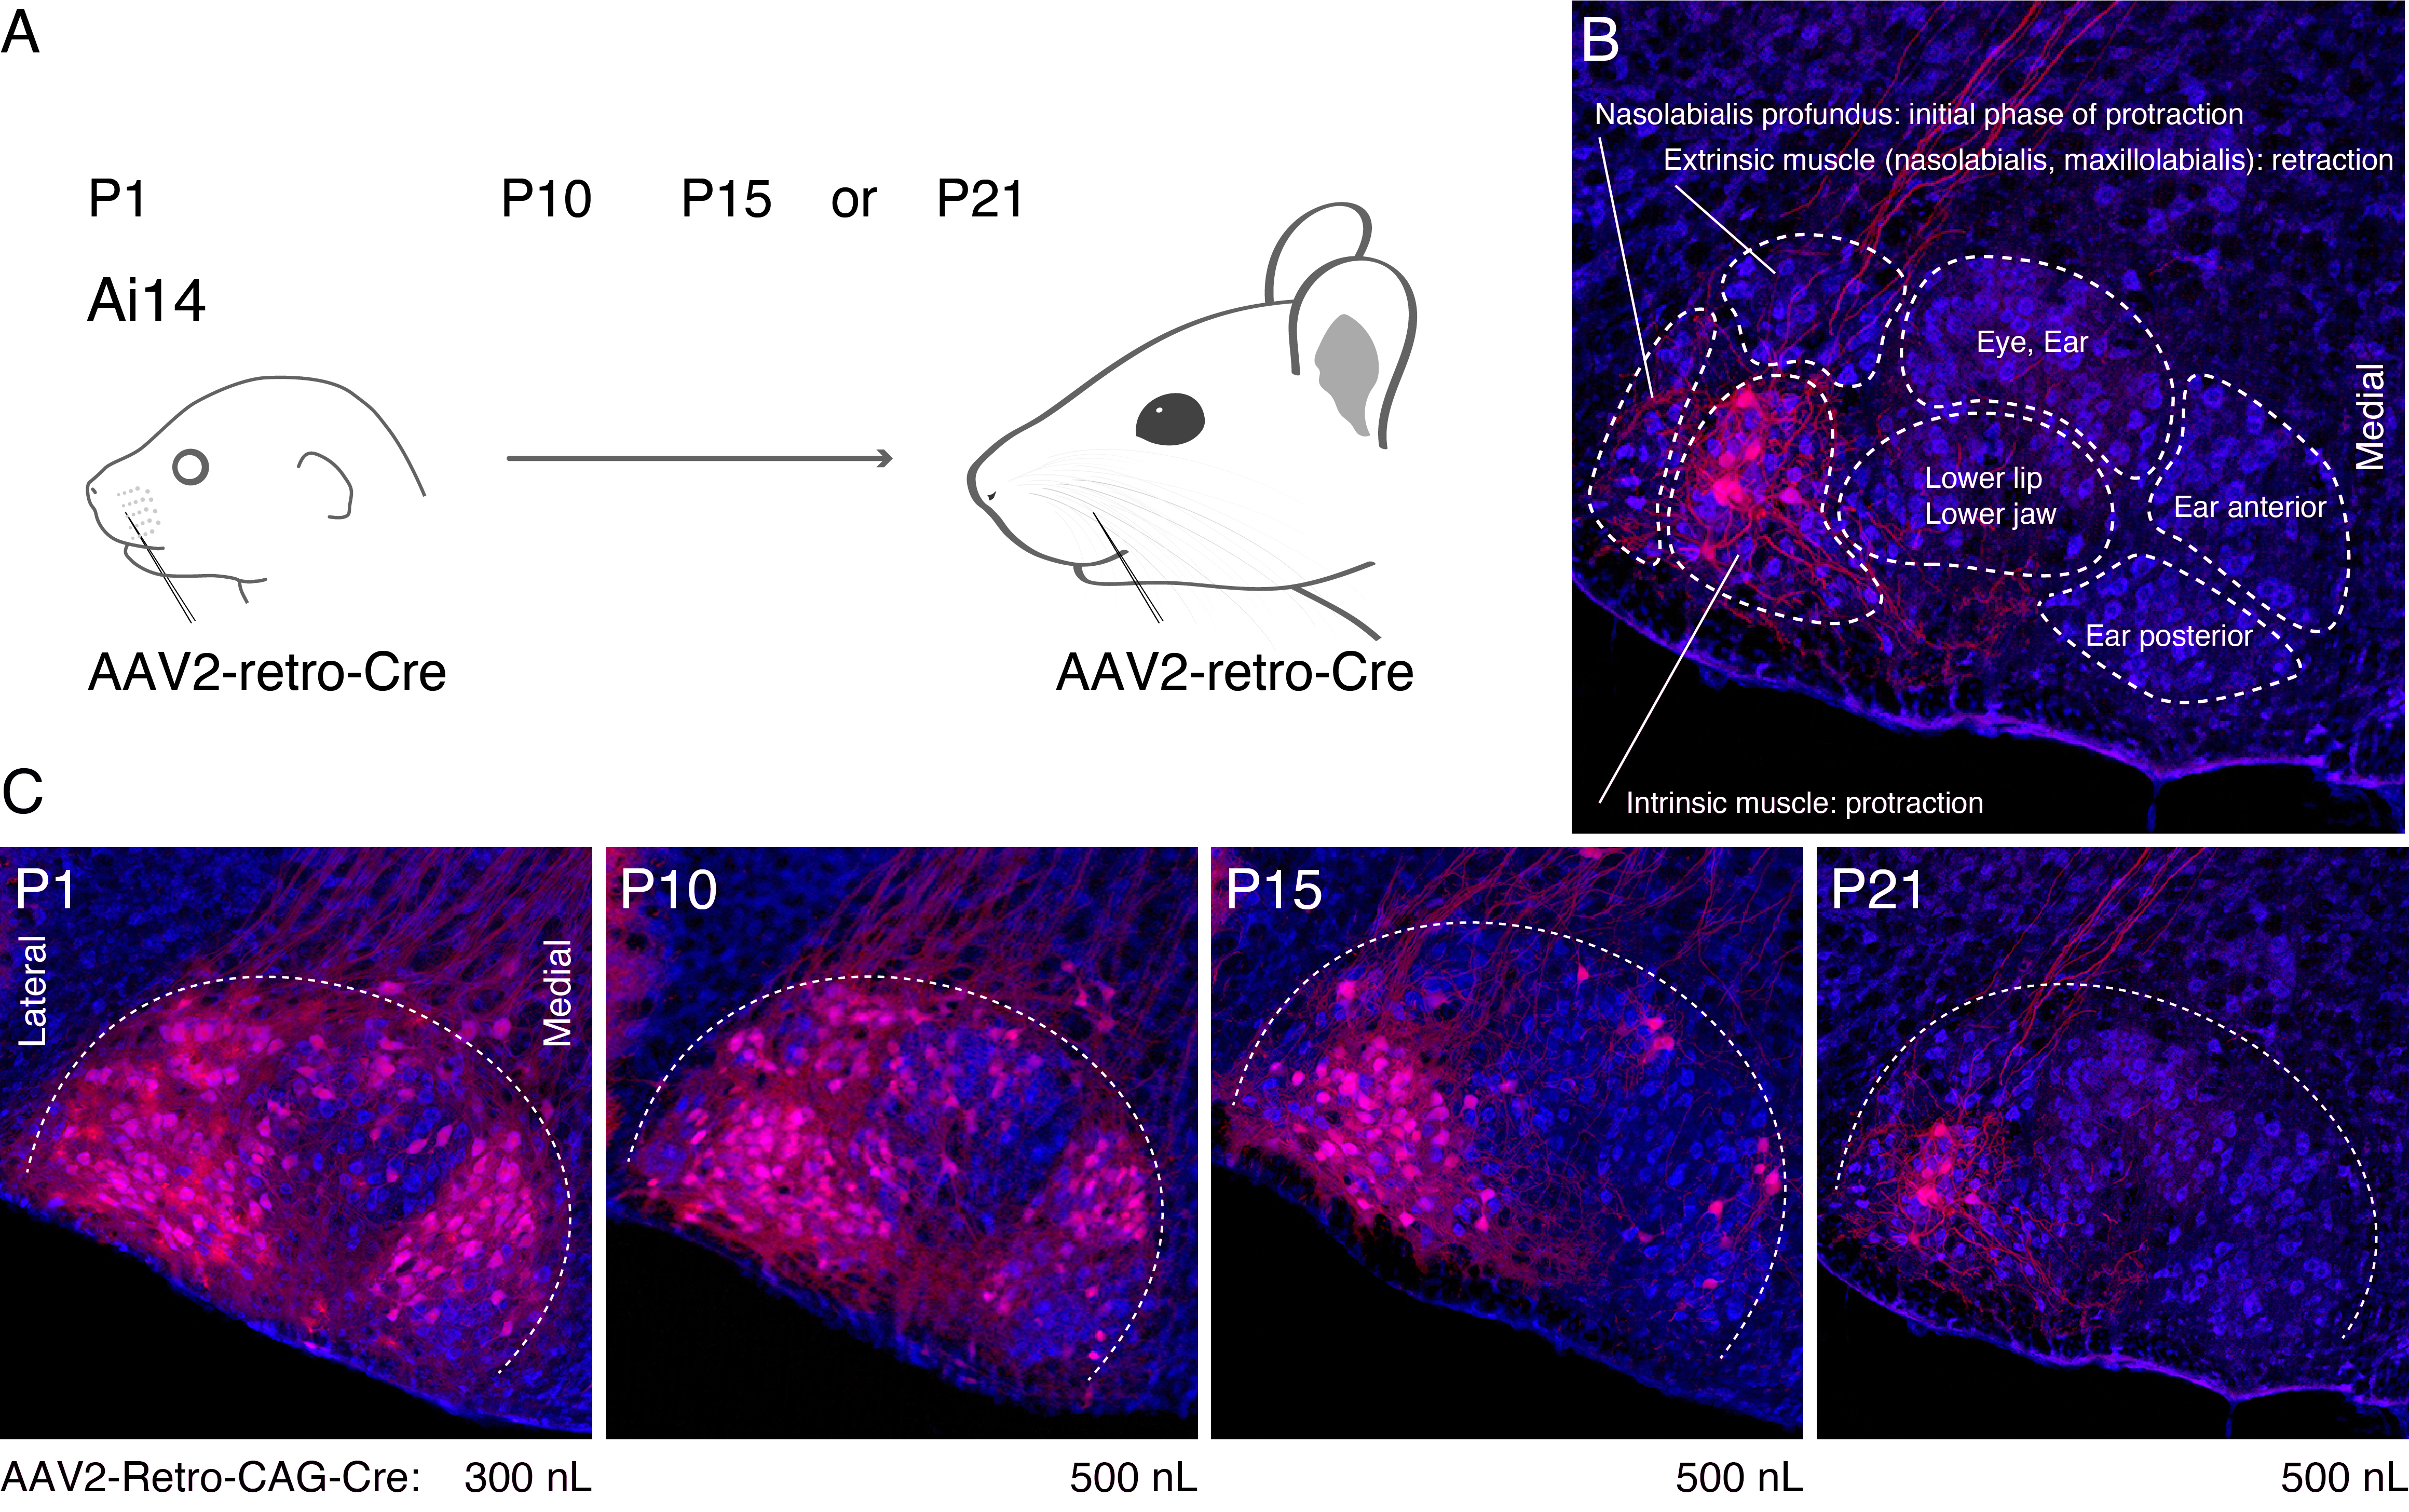

Supplement: supp [file elife-67291-supp-v1.zip › elife_poa_e67291_Figure_1_figure_supplement_1.jpg]

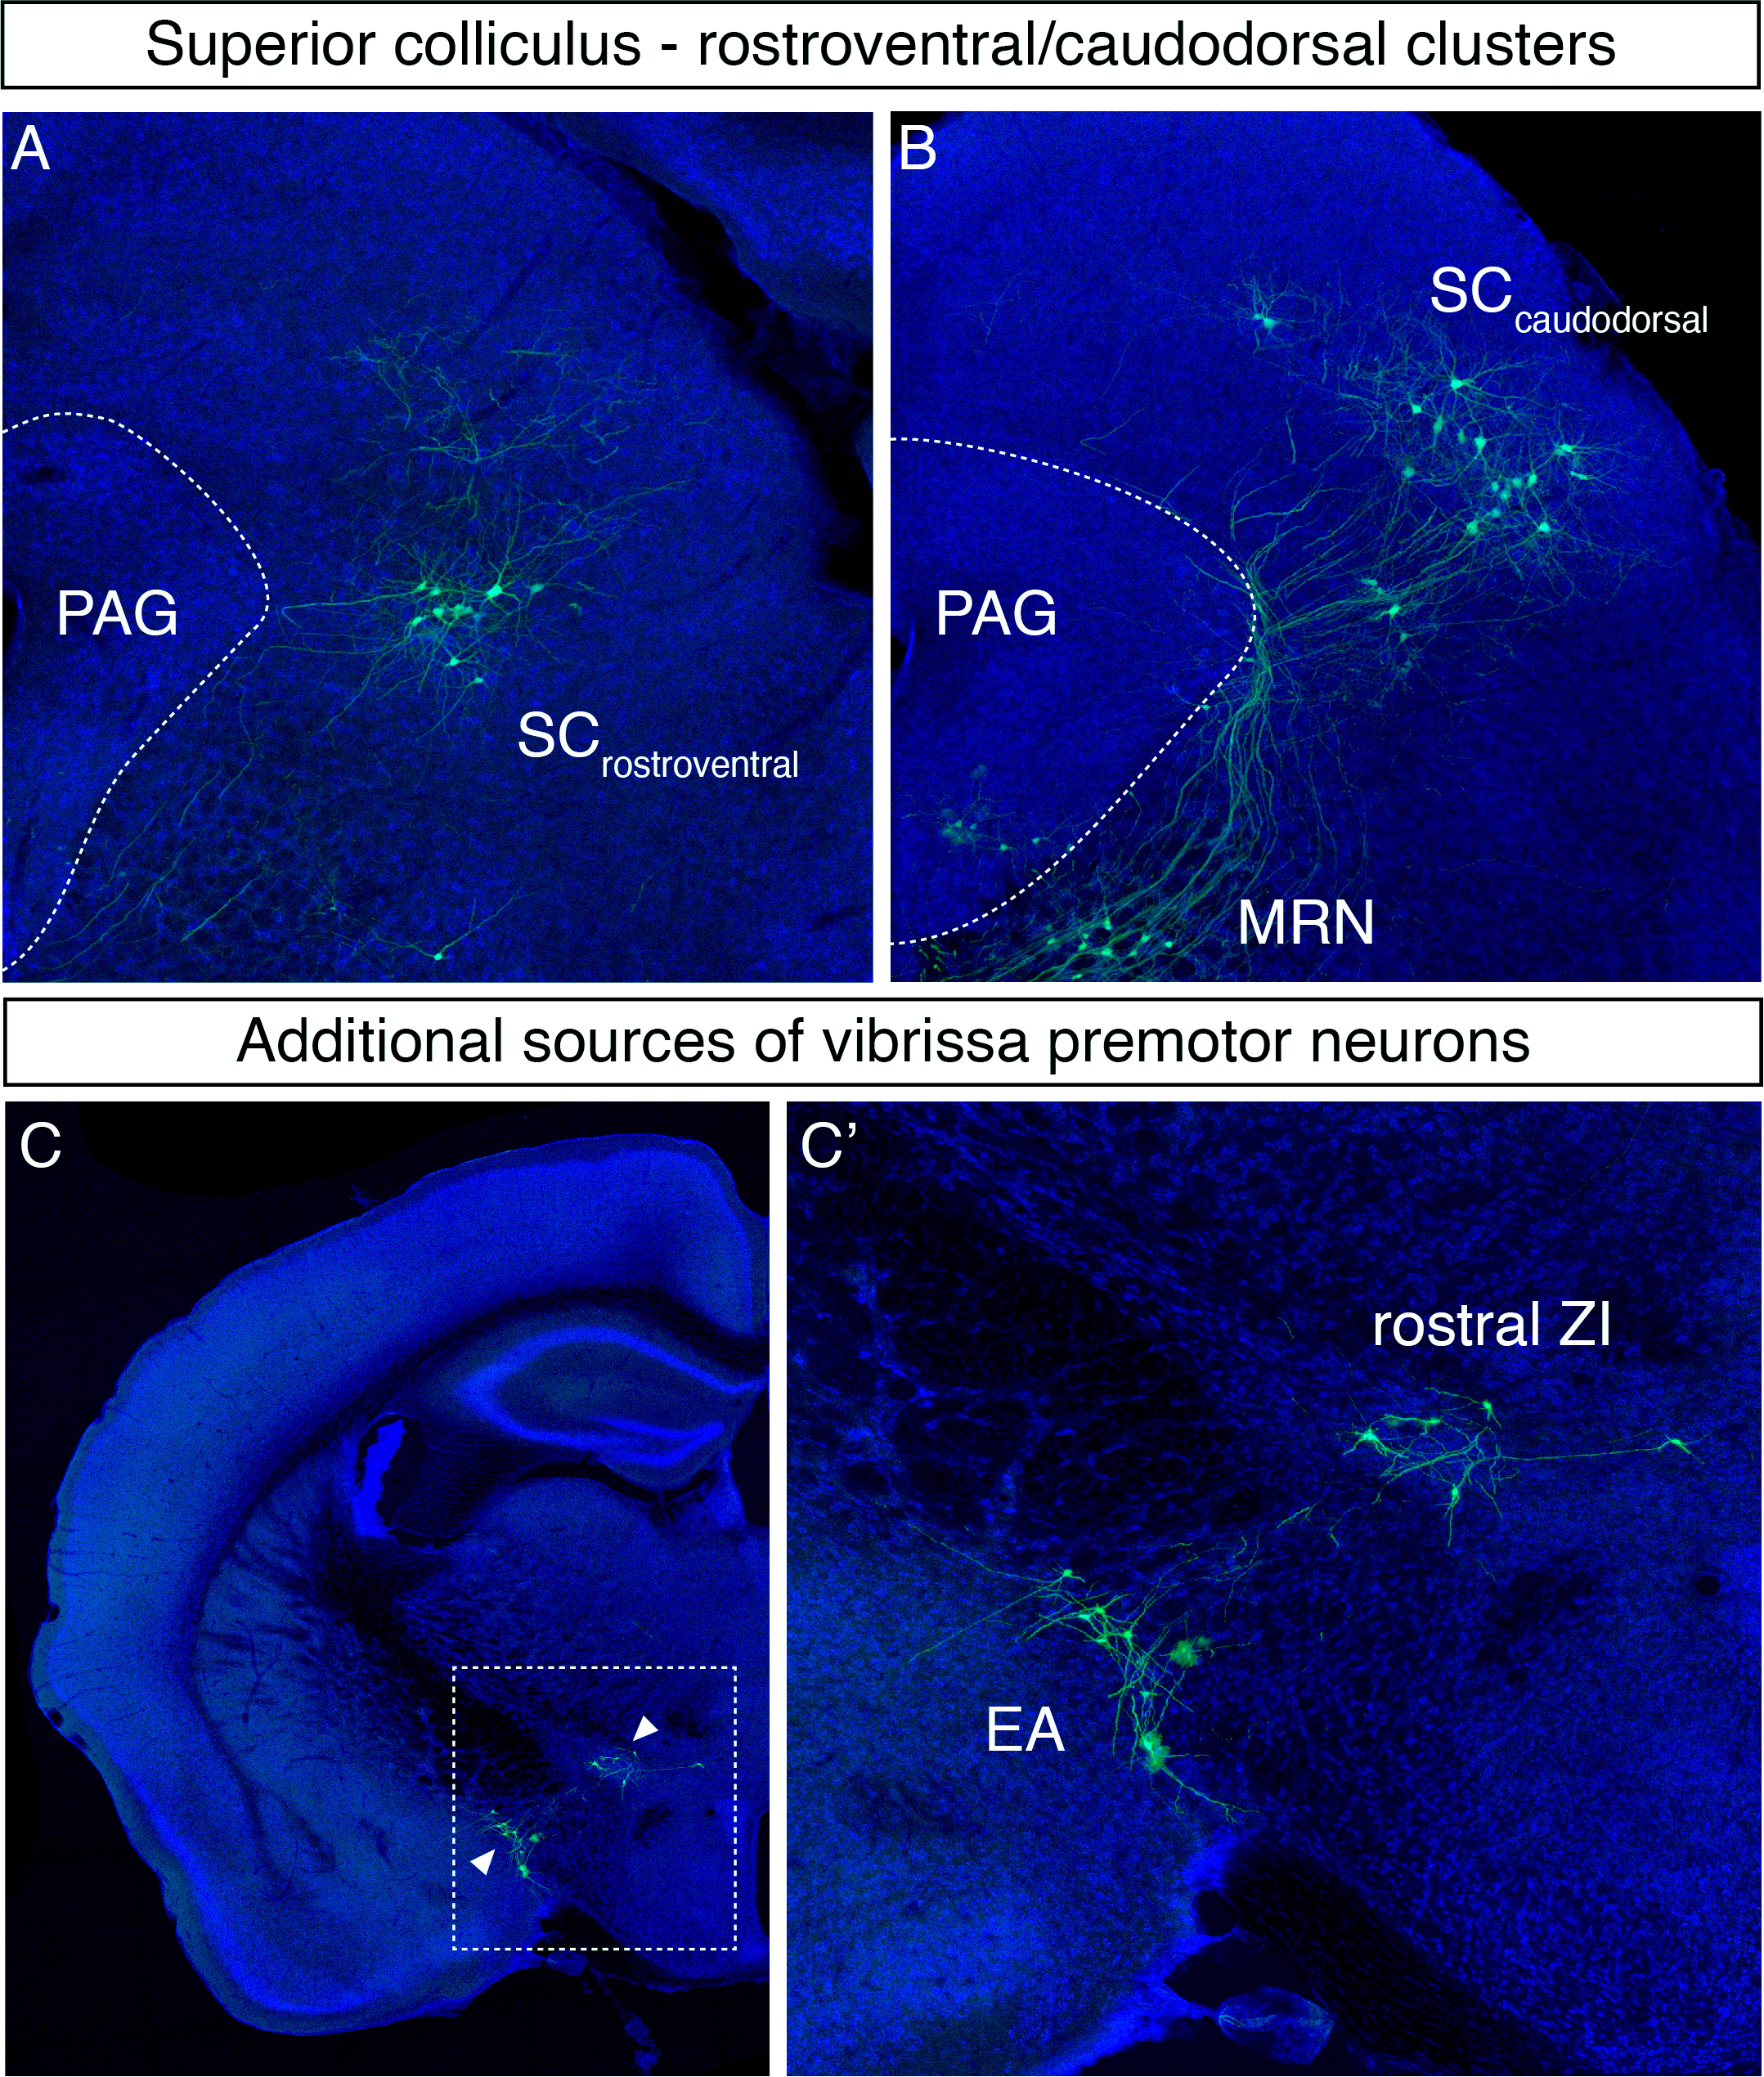

Supplement: supp [file elife-67291-supp-v1.zip › elife_poa_e67291_Figure_2_figure_supplement_1.jpg]

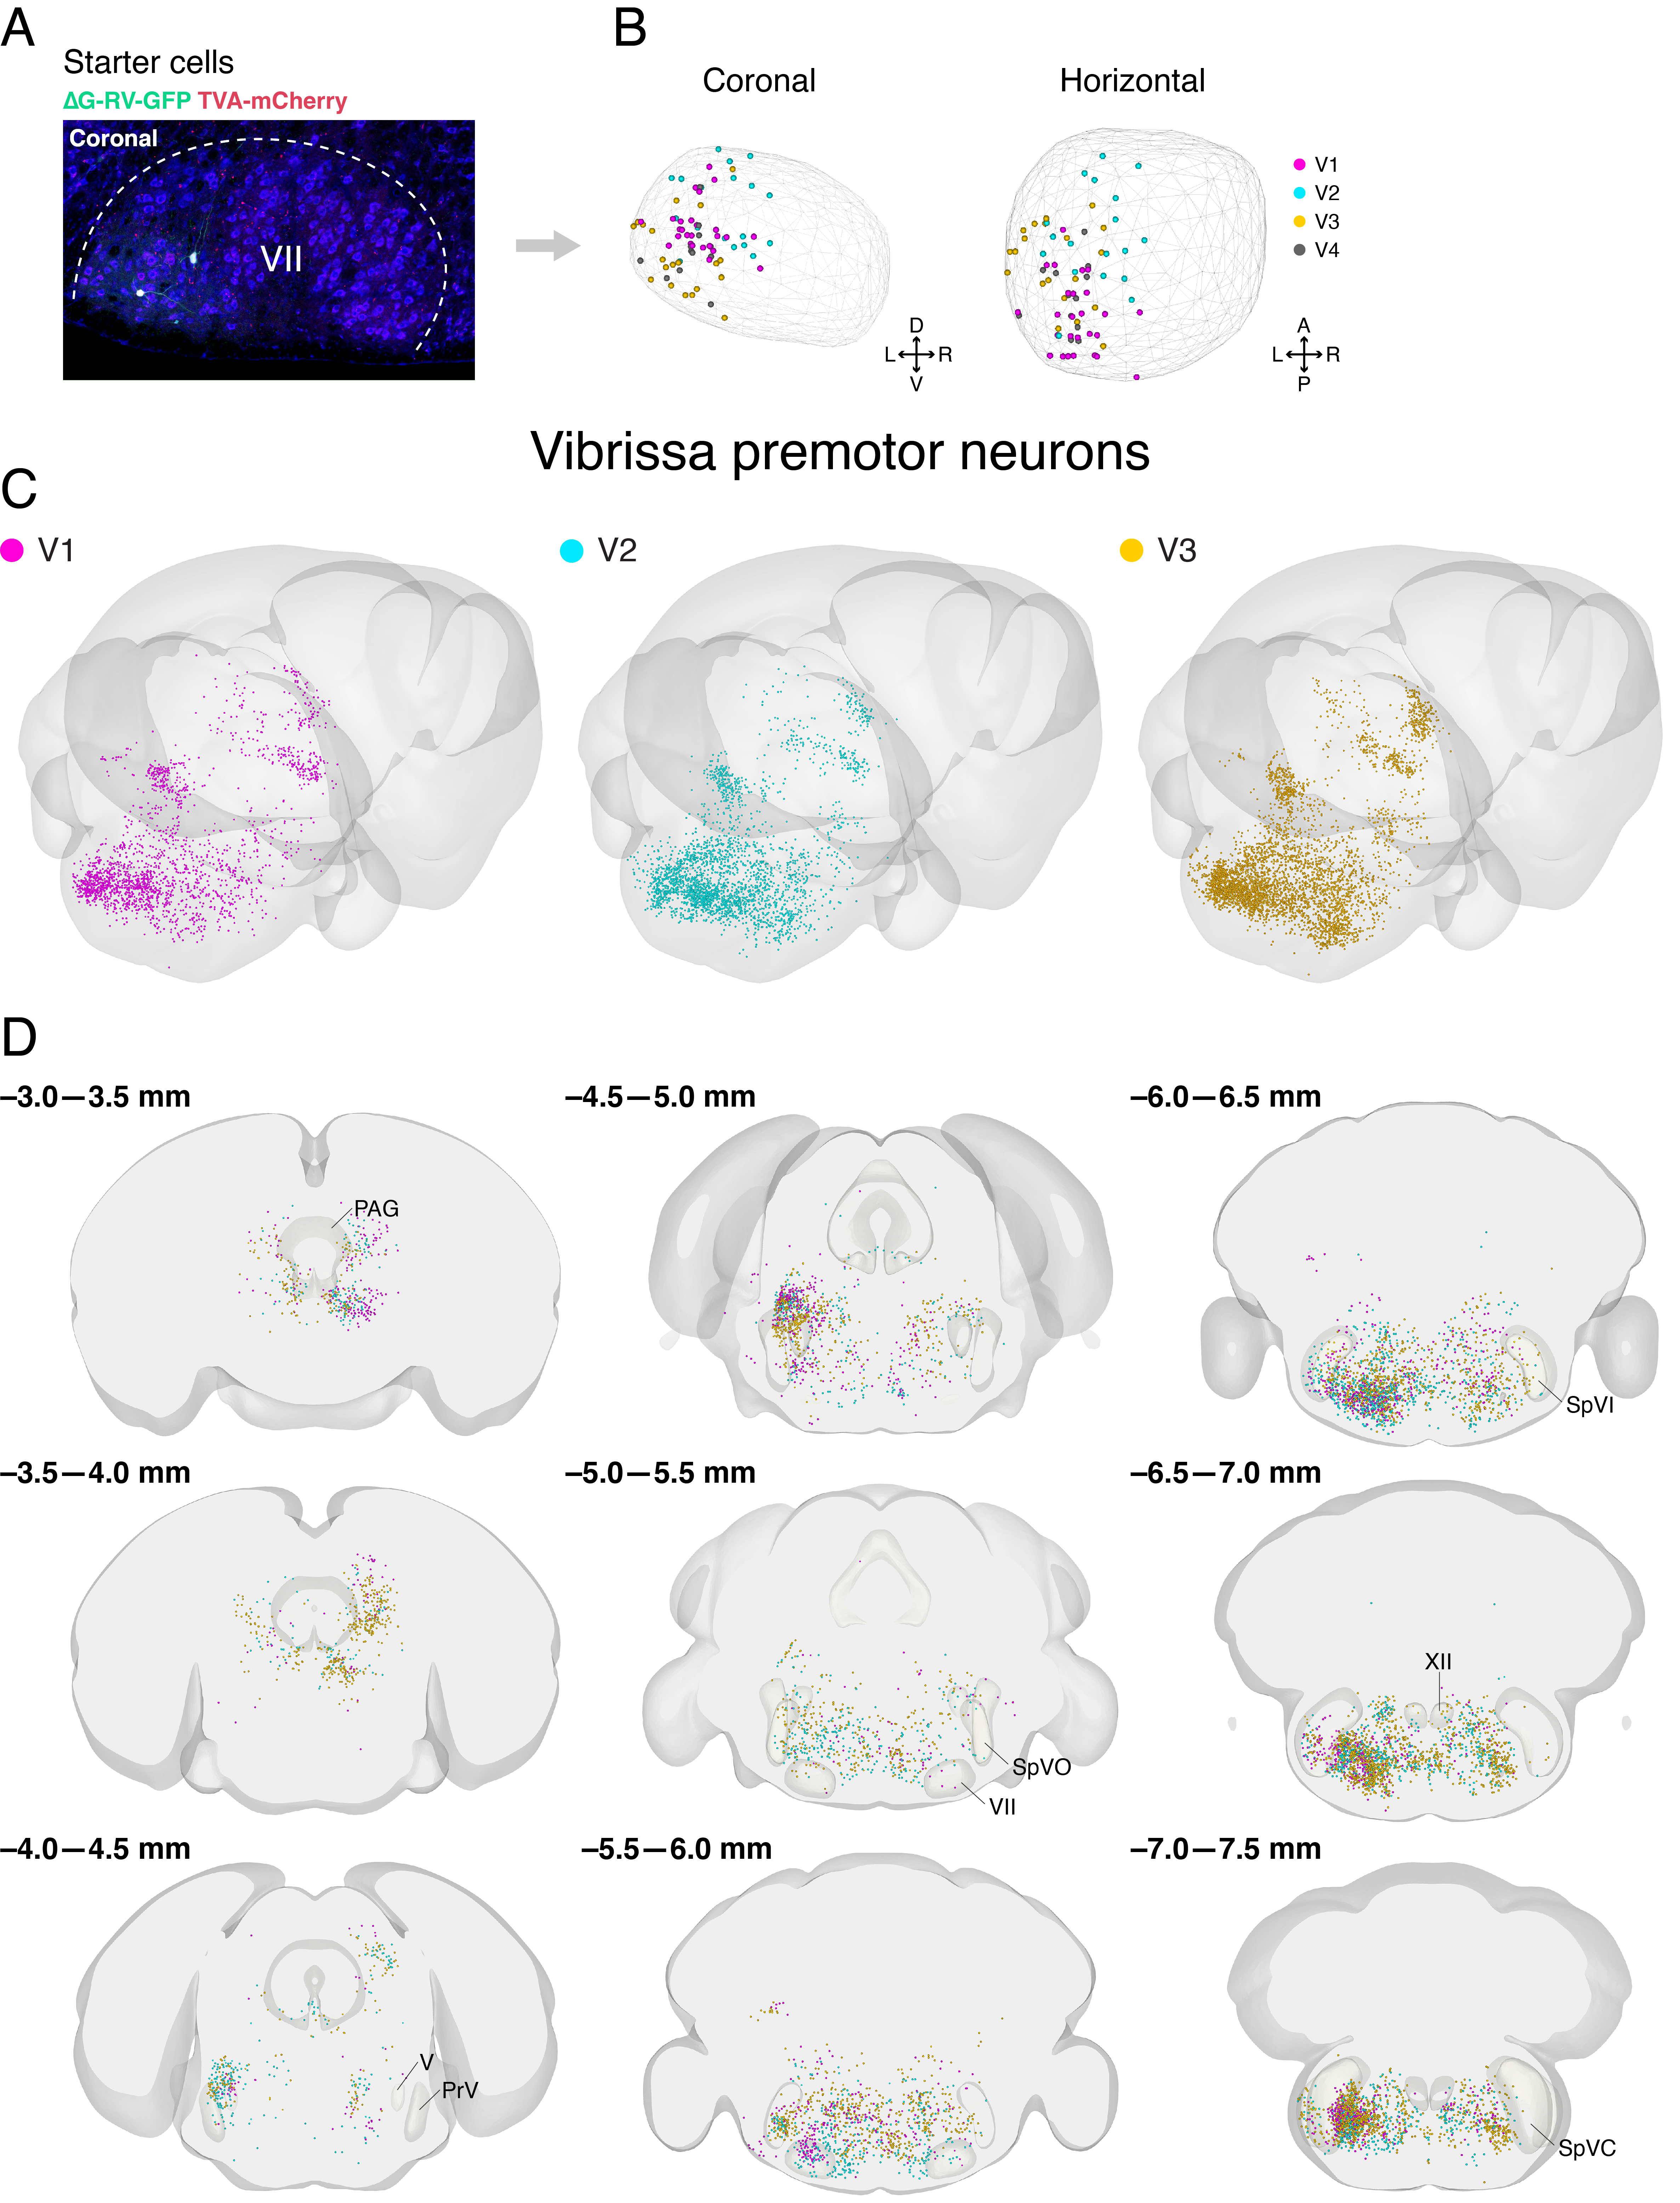

Supplement: supp [file elife-67291-supp-v1.zip › elife_poa_e67291_Figure_5_figure_supplement_1.jpg]

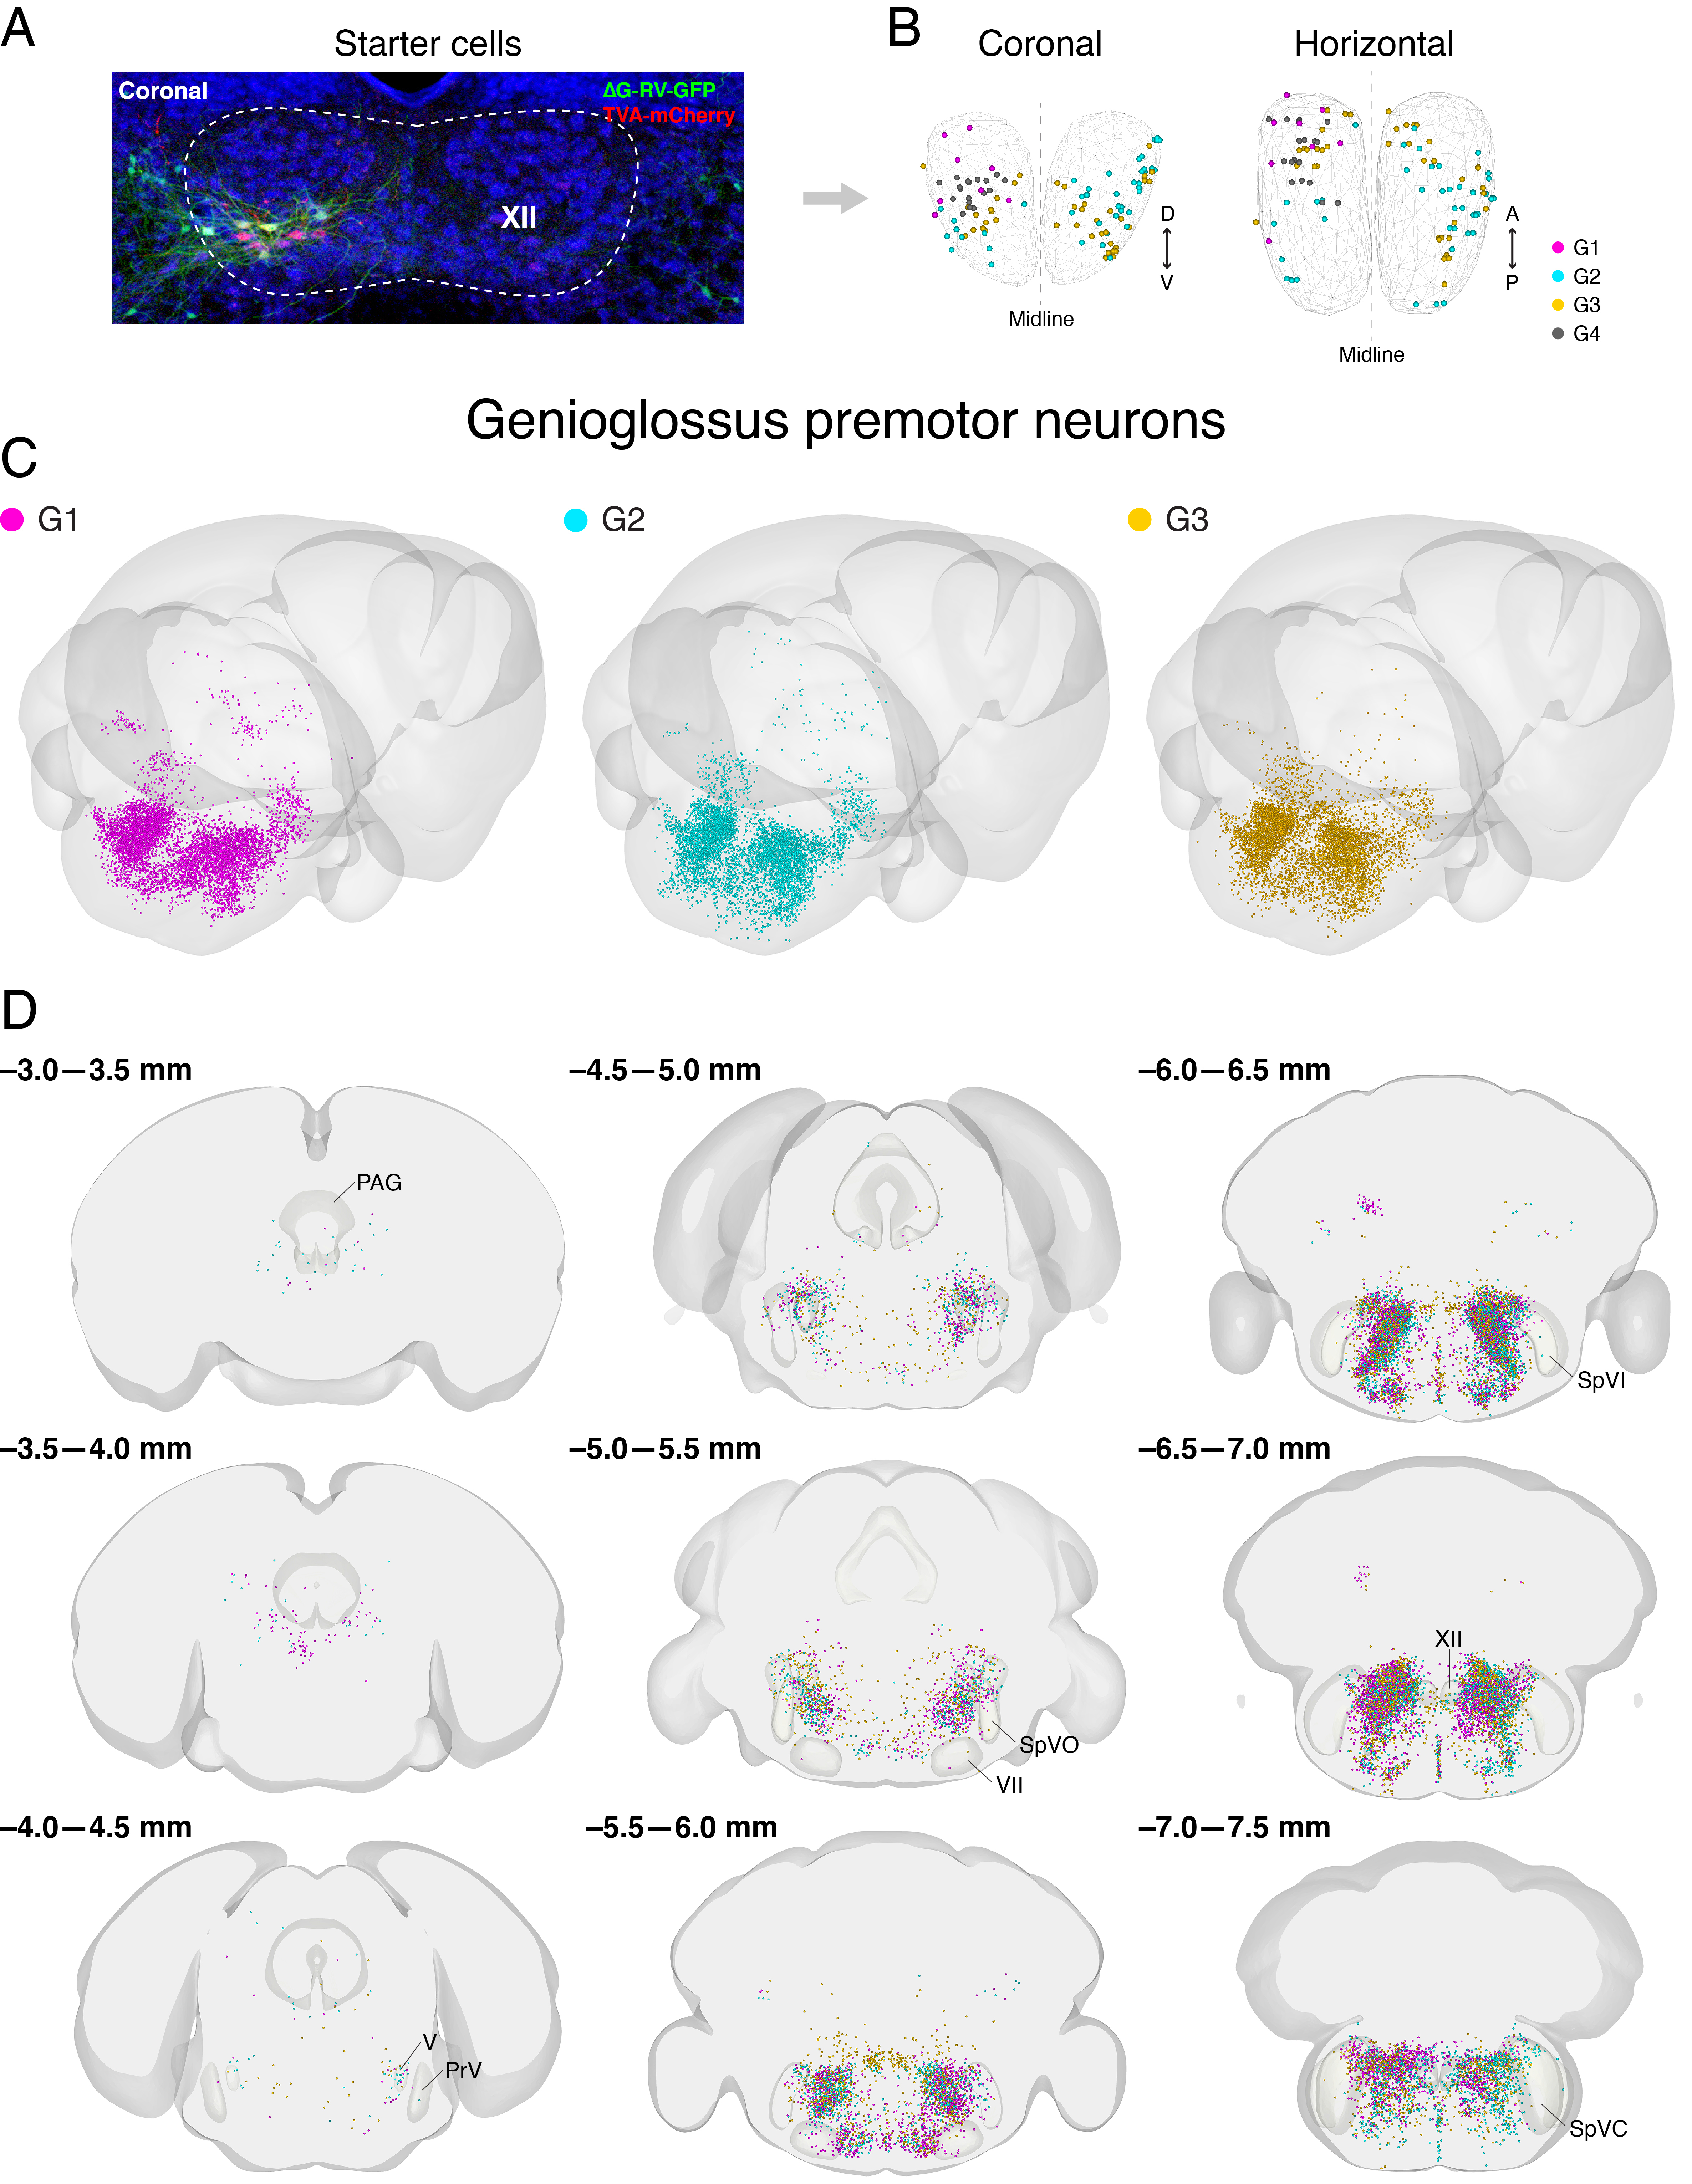

Supplement: supp [file elife-67291-supp-v1.zip › elife_poa_e67291_Figure_5_figure_supplement_2.jpg]

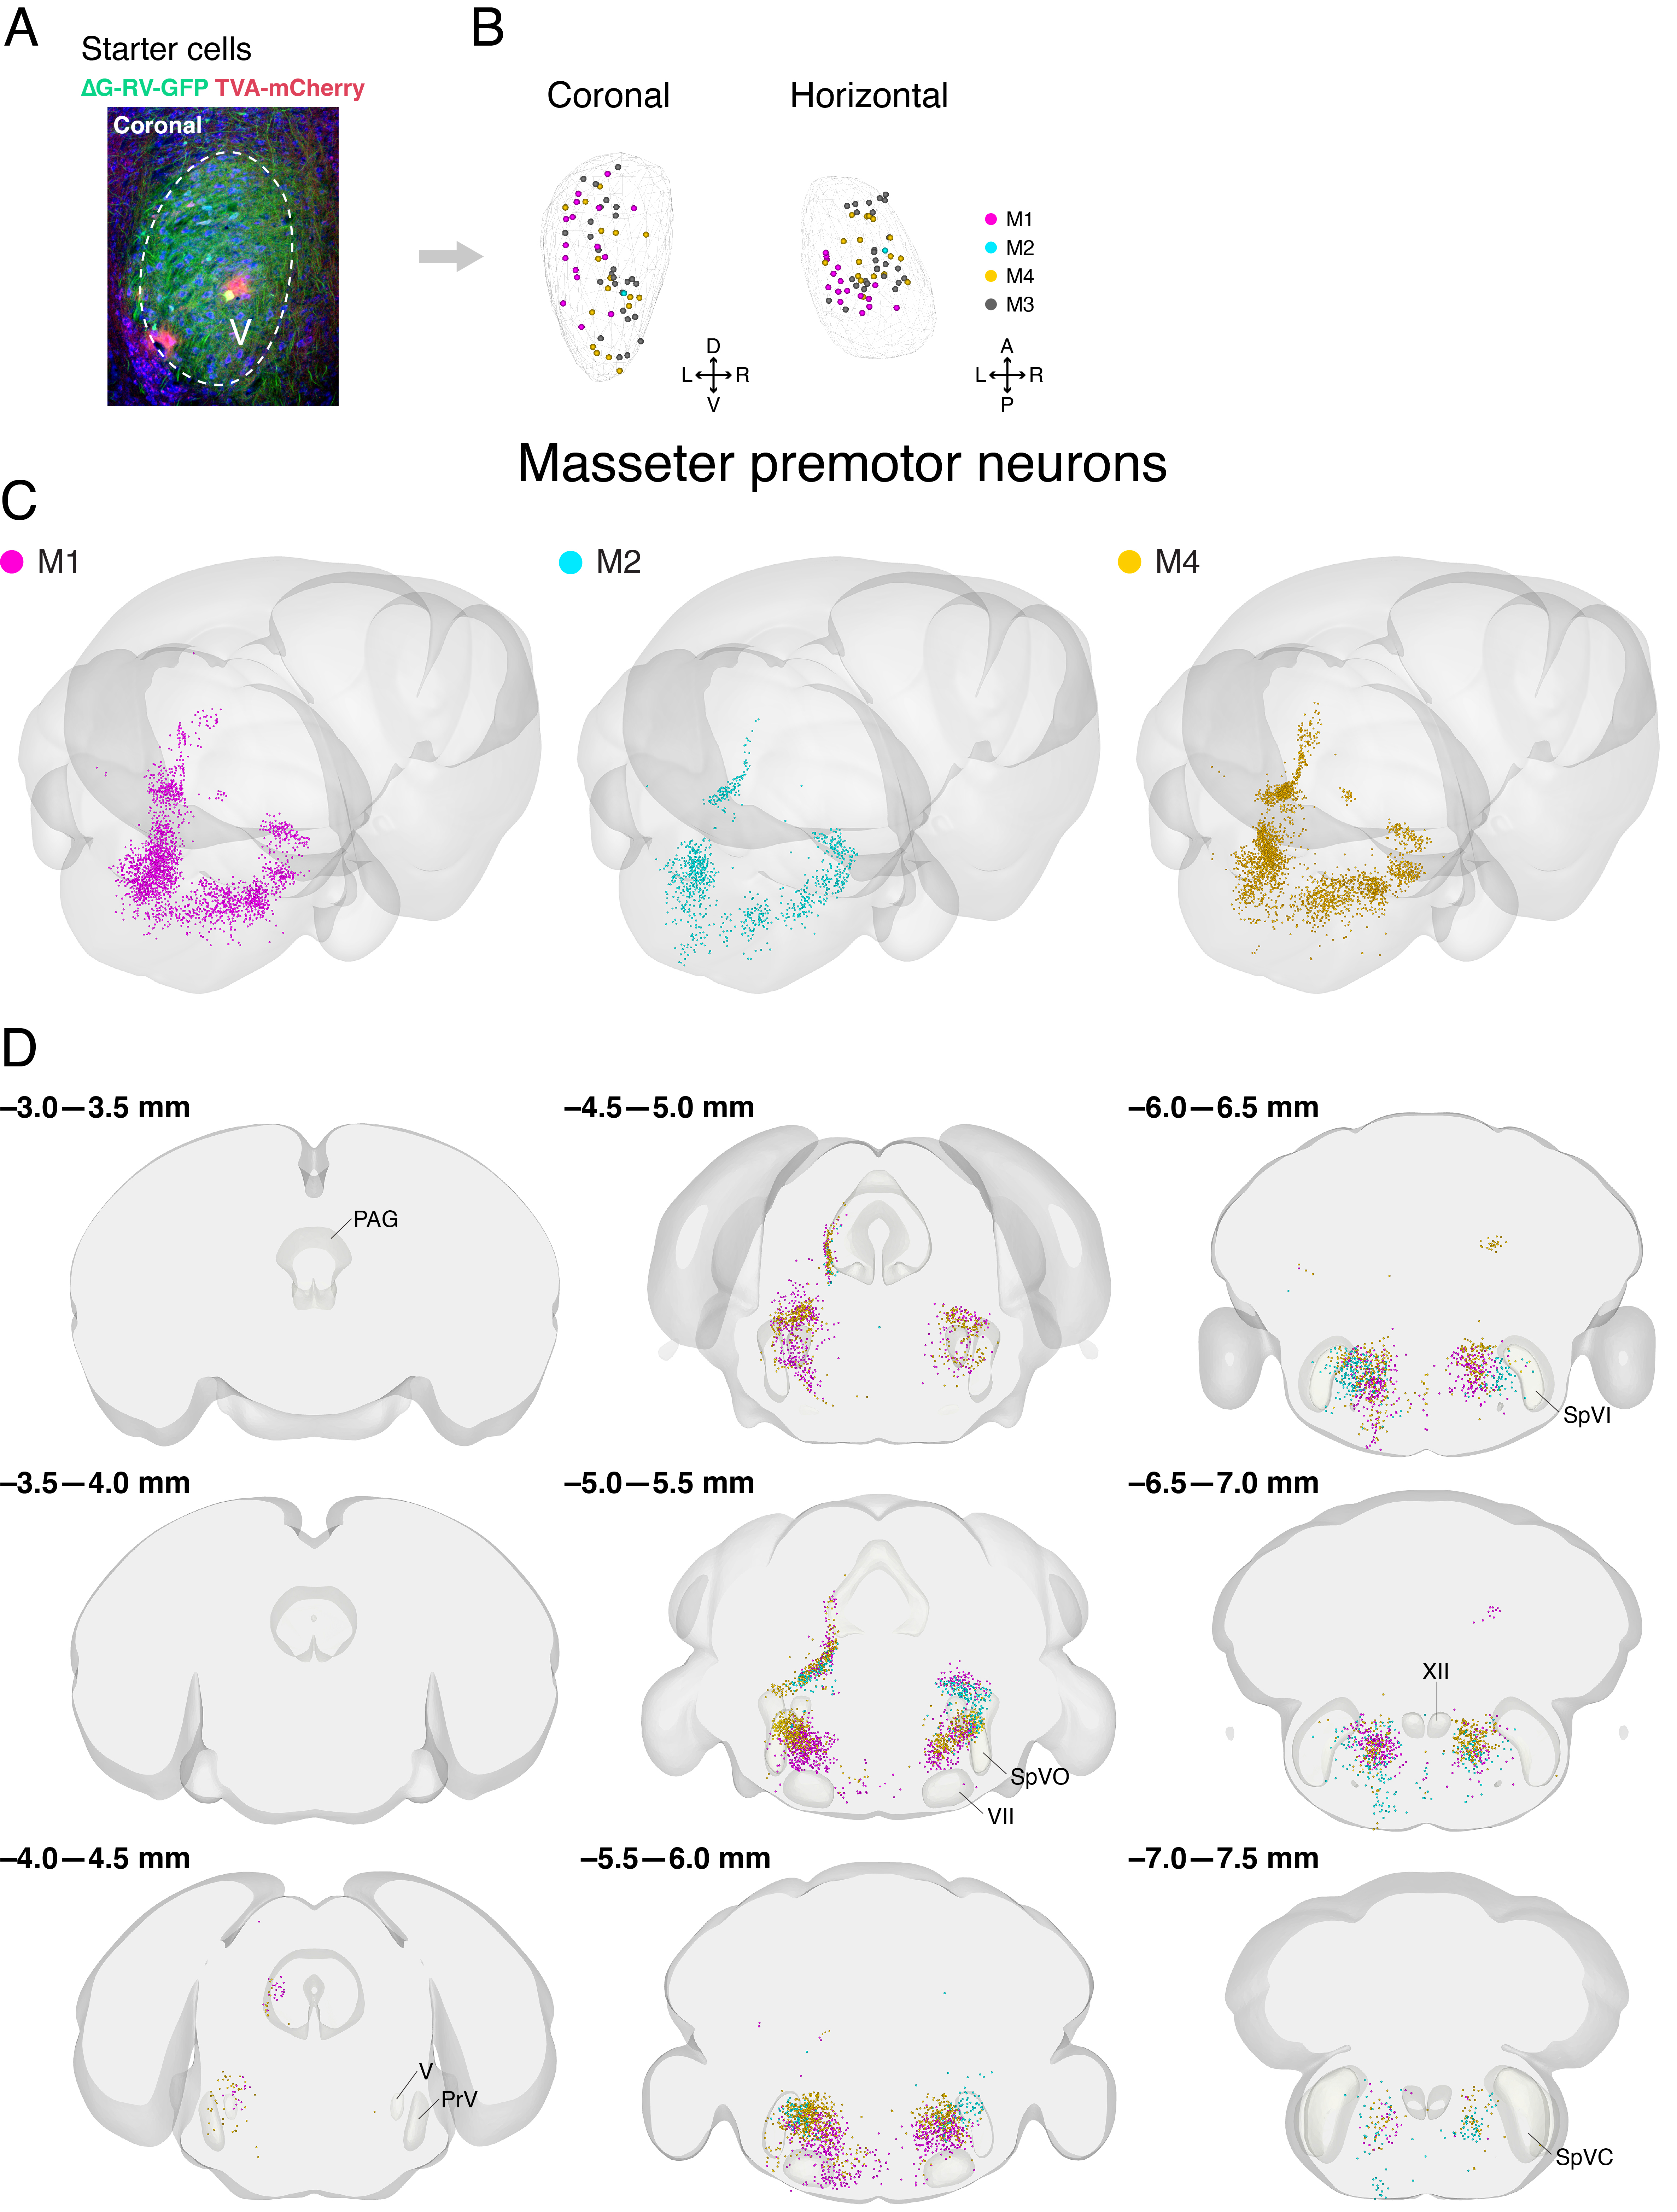

Supplement: supp [file elife-67291-supp-v1.zip › elife_poa_e67291_Figure_5_figure_supplement_3.jpg]

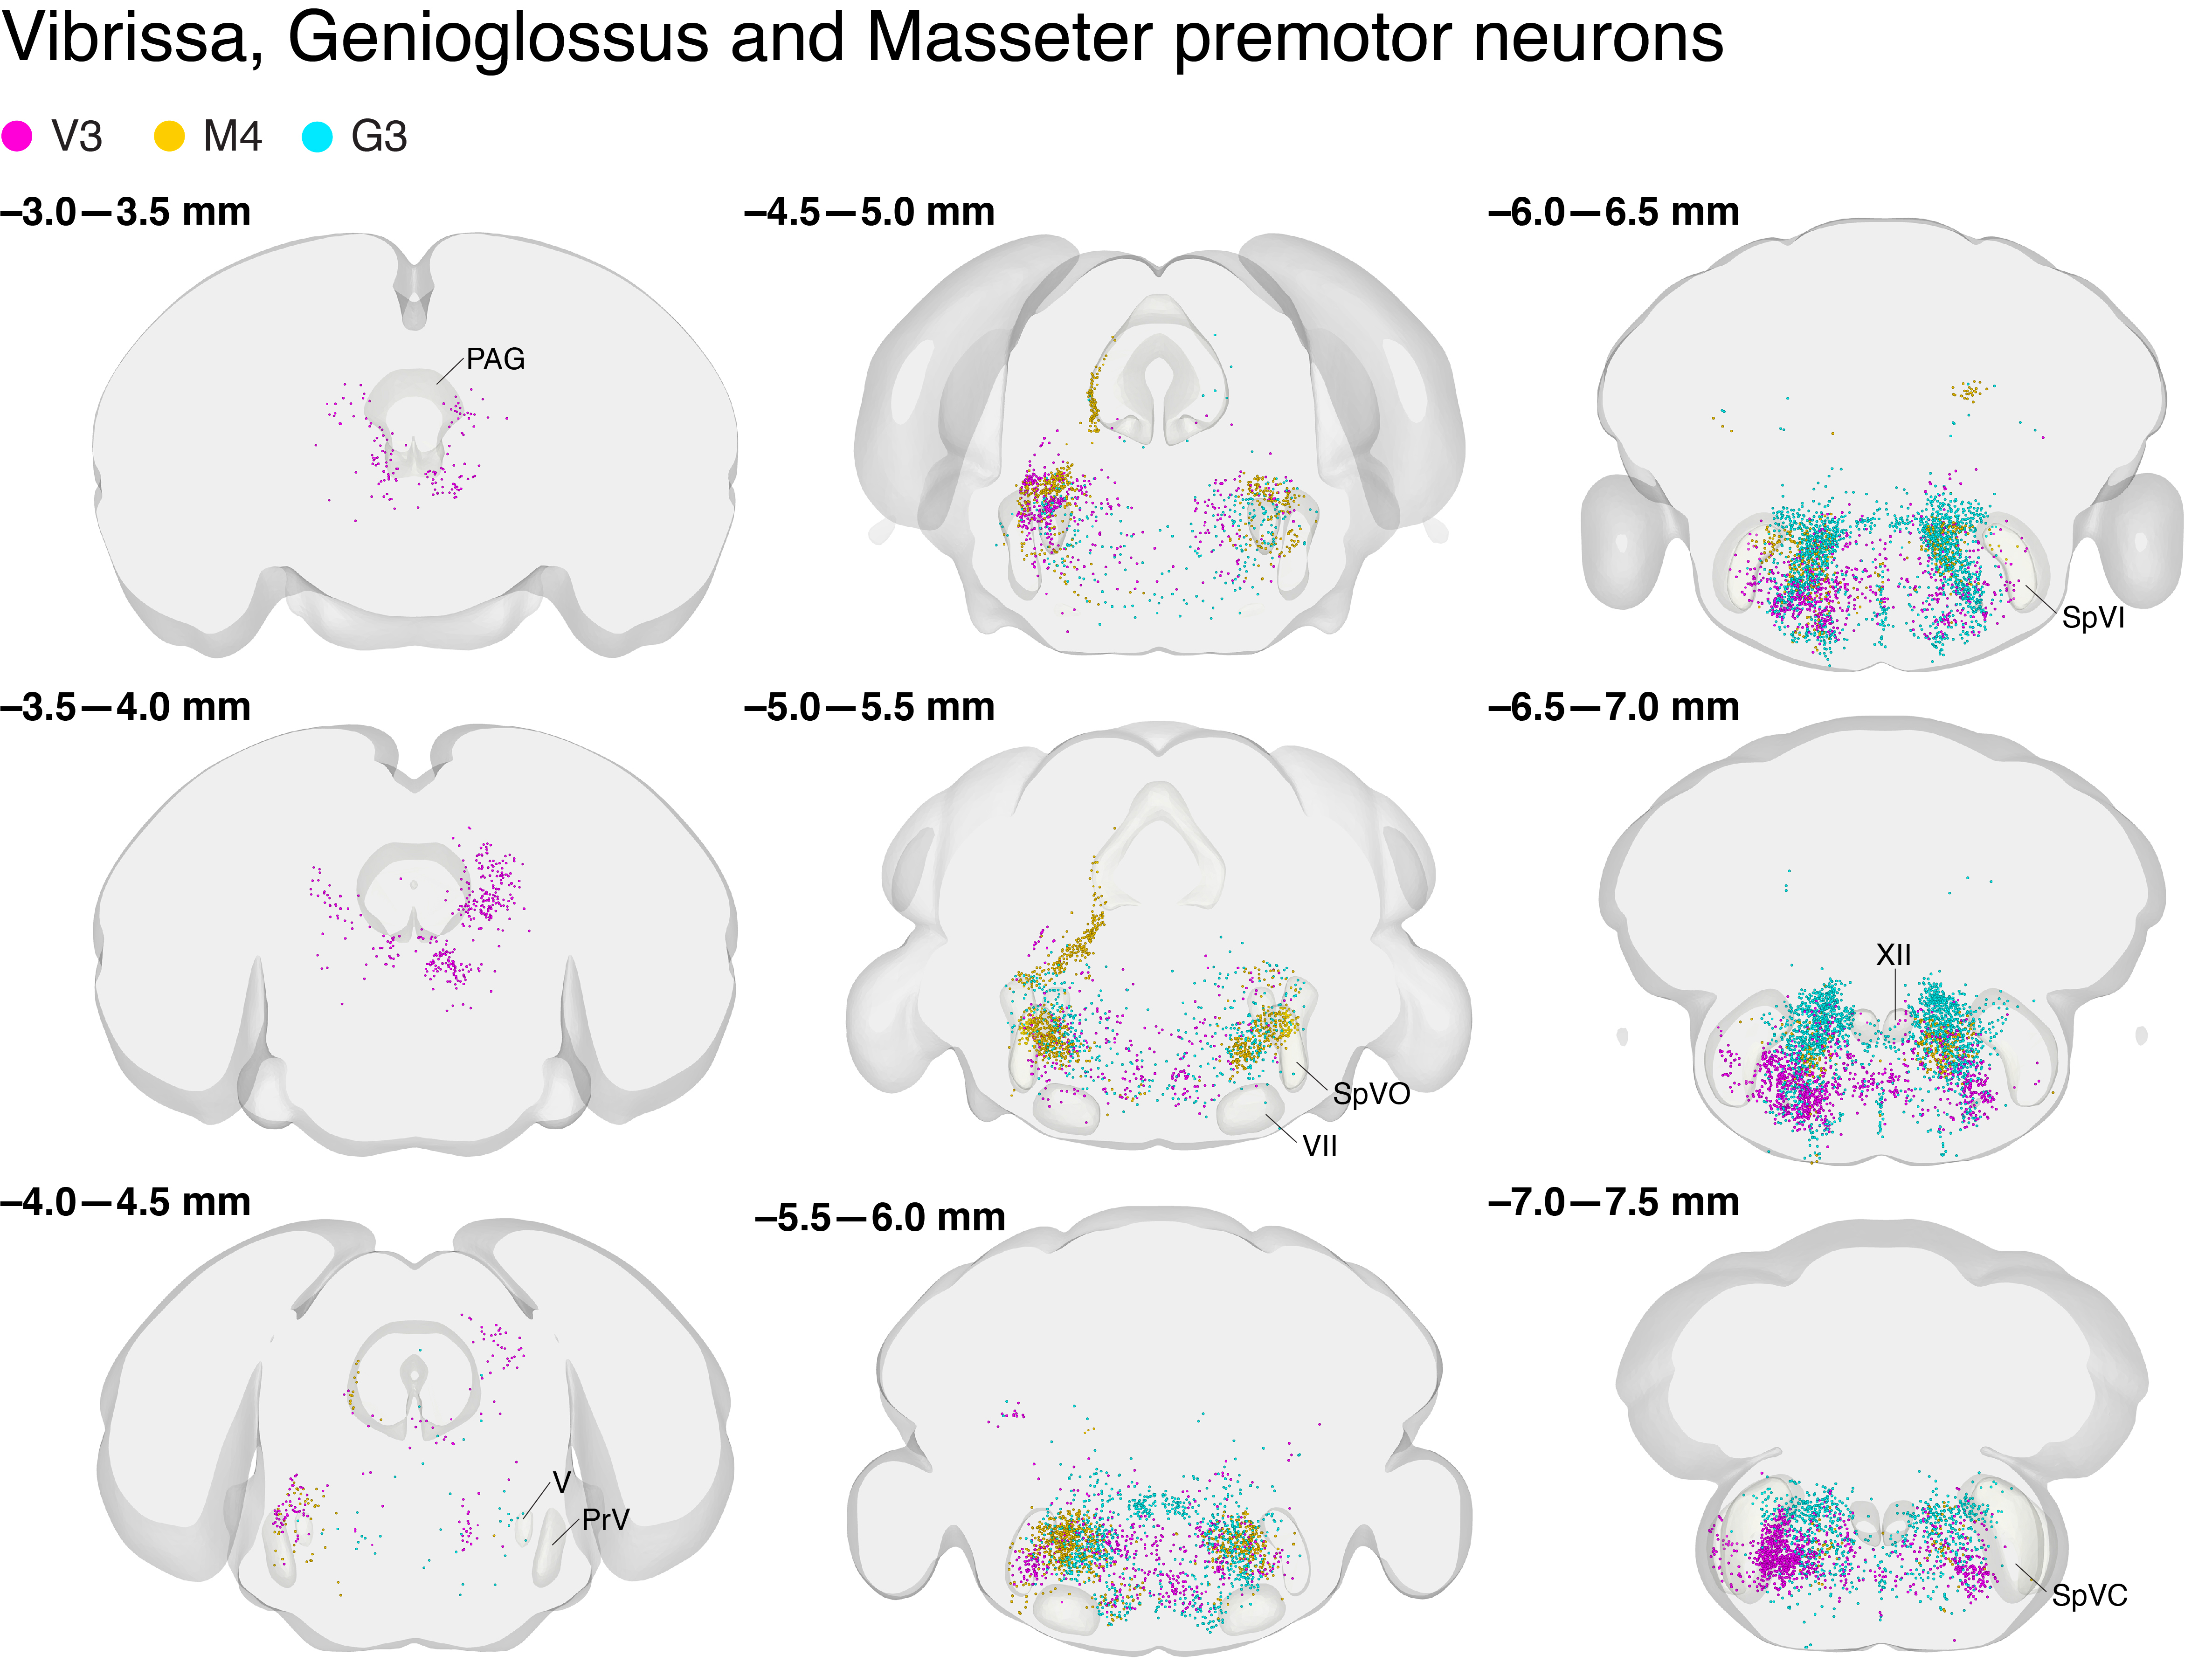

Supplement: supp [file elife-67291-supp-v1.zip › elife_poa_e67291_Figure_5_figure_supplement_4.jpg]

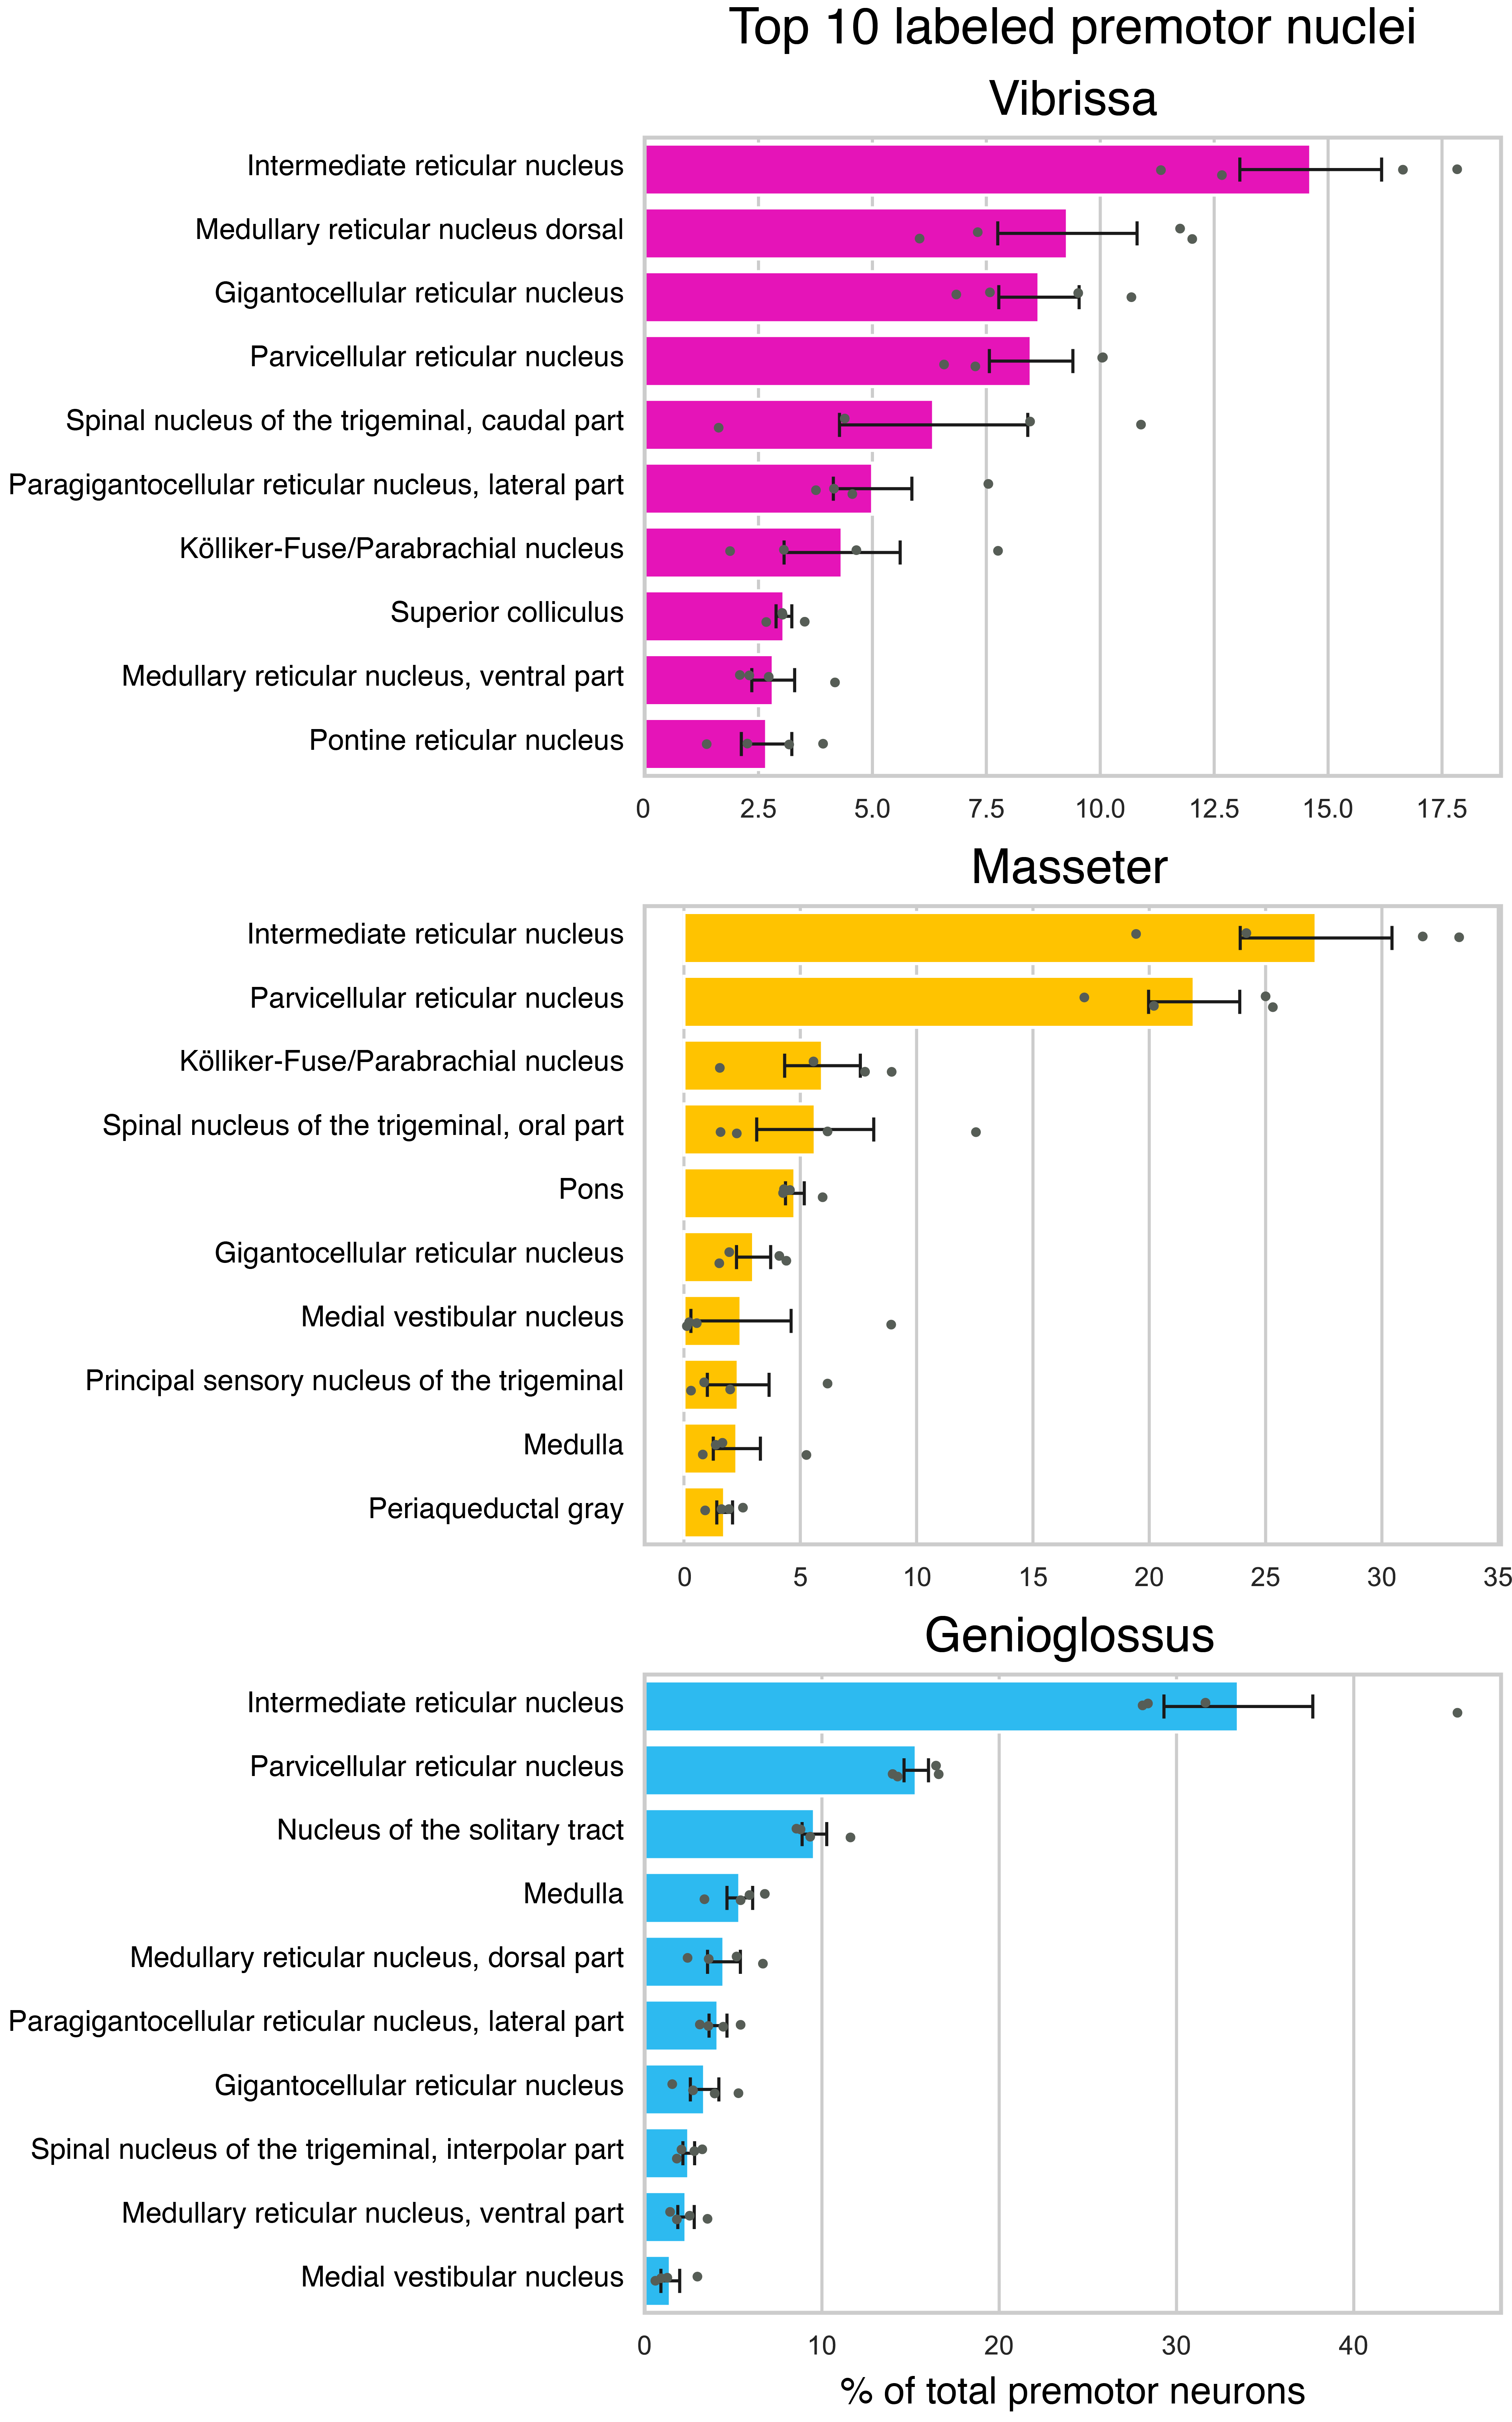

Supplement: supp [file elife-67291-supp-v1.zip › elife_poa_e67291_Figure_5_figure_supplement_5.jpg]

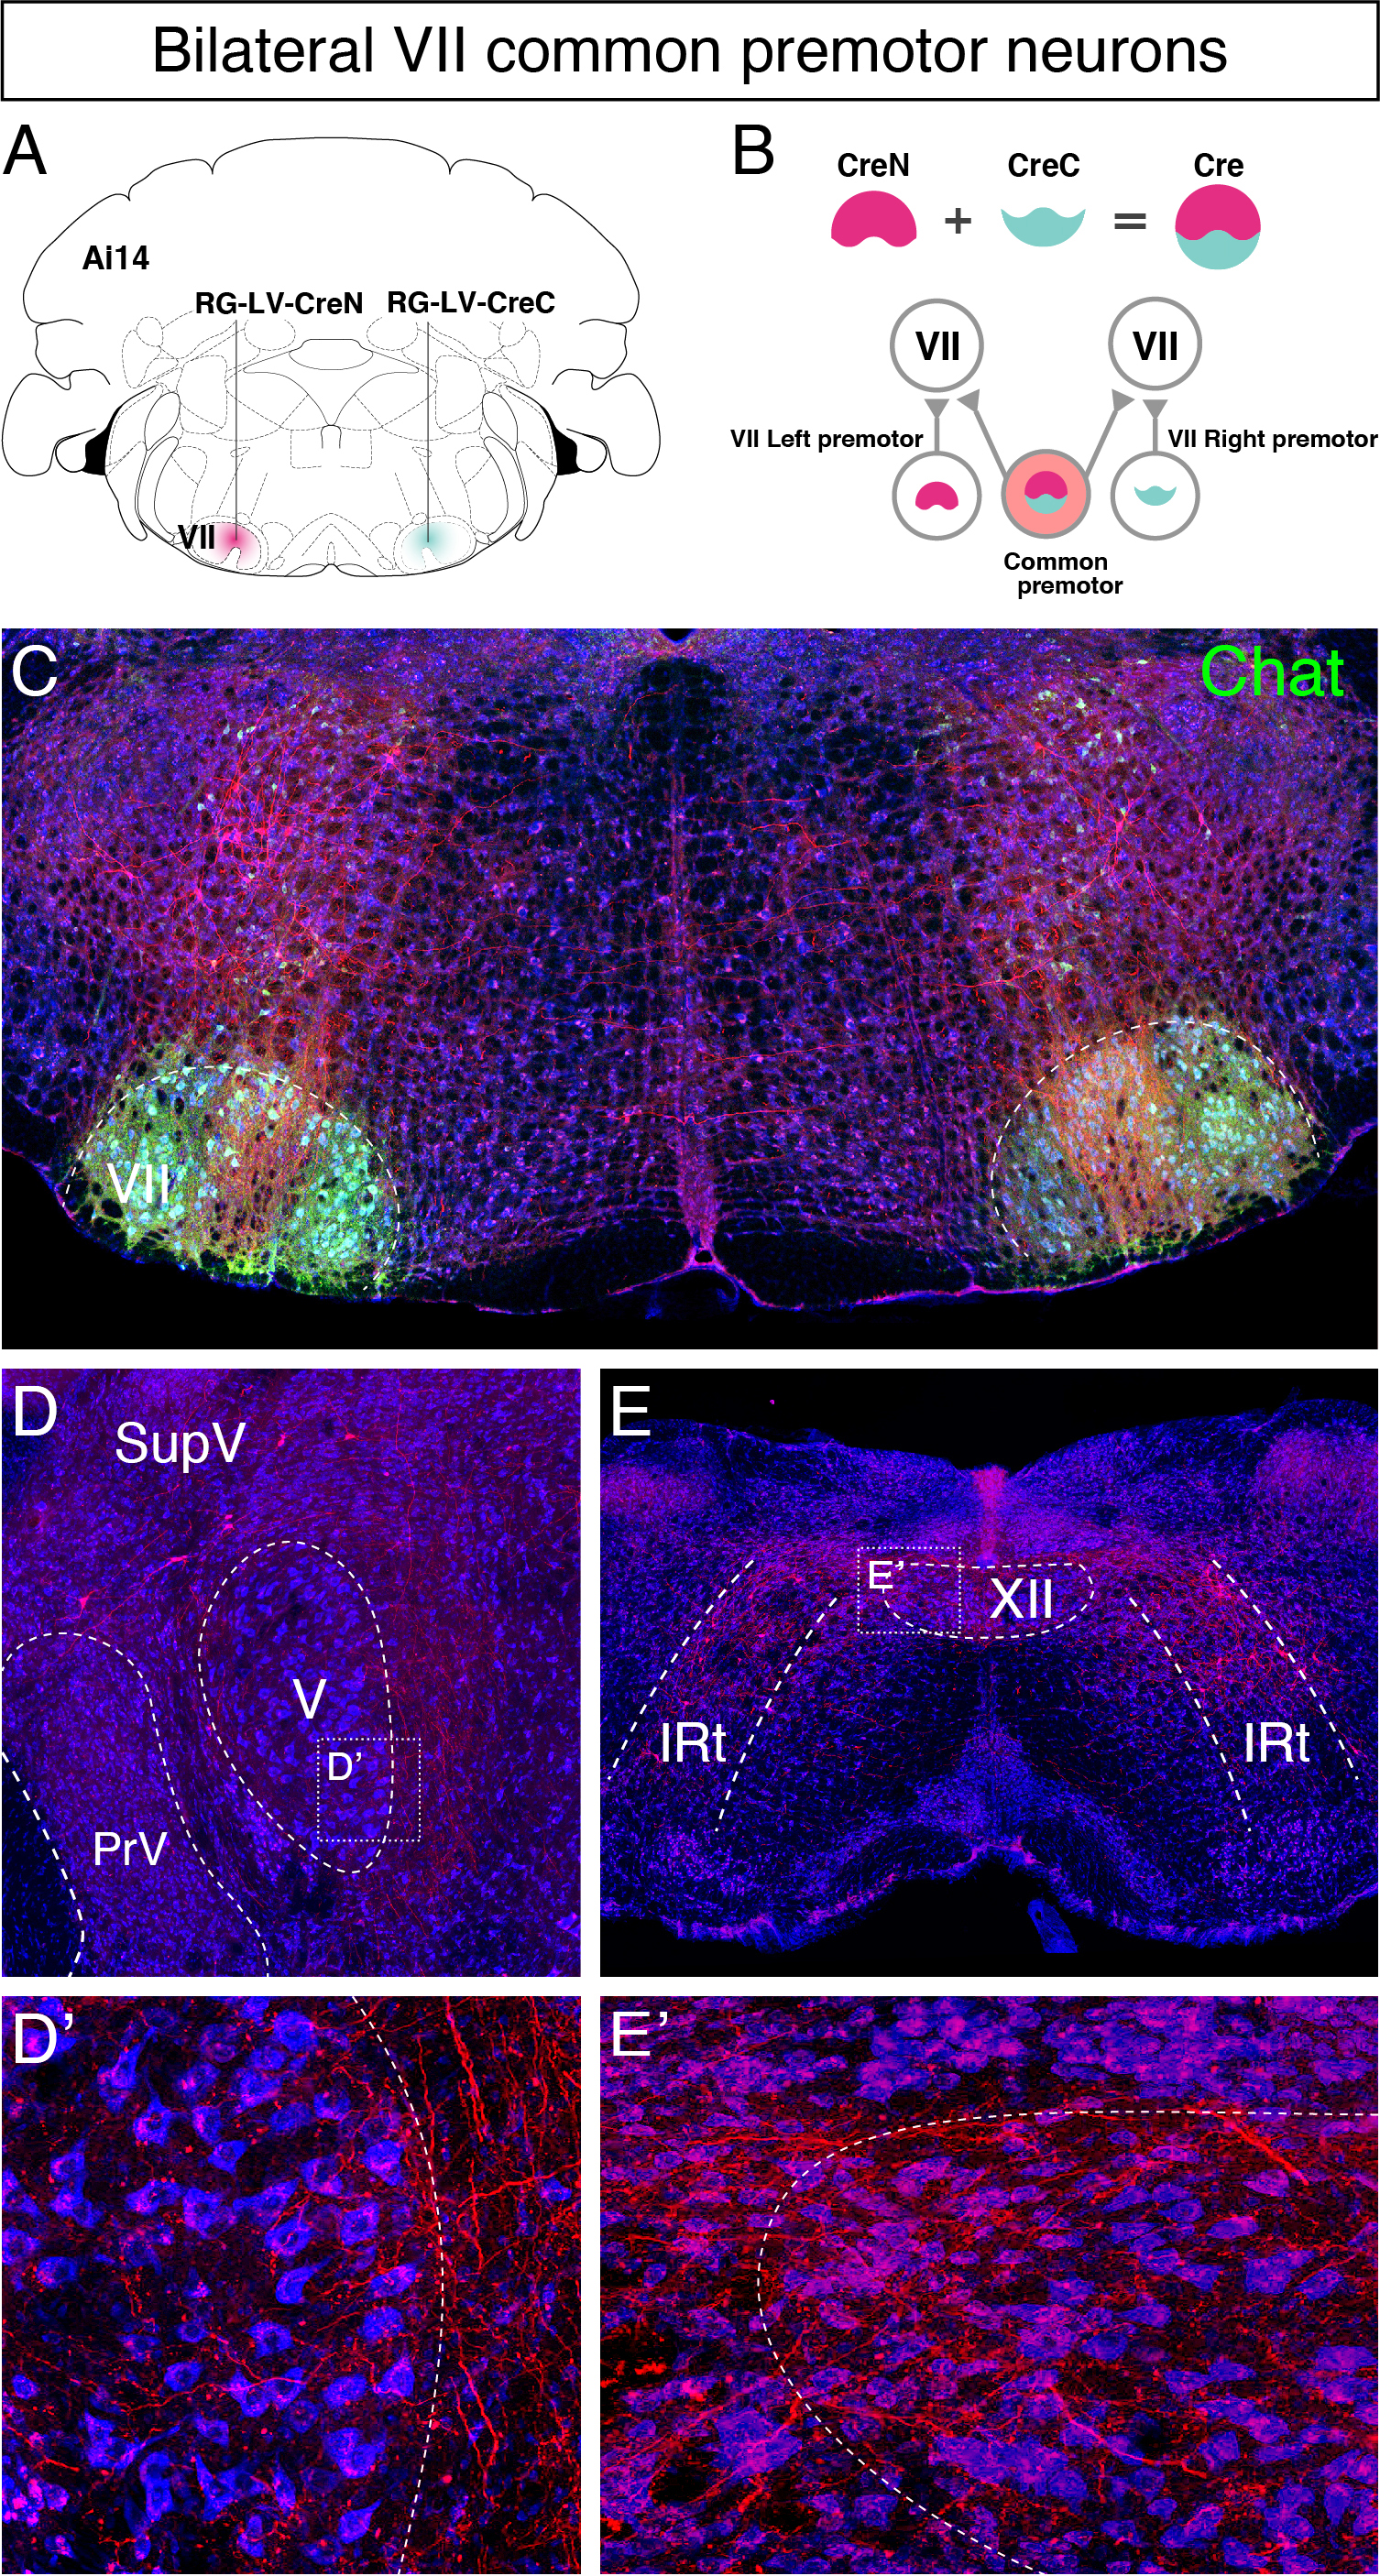

Supplement: supp [file elife-67291-supp-v1.zip › elife_poa_e67291_Figure_7_figure_supplement_1.jpg]
